# Supplementary material
Source: ML conference proceedings conference paper supplement (https://openreview.net/forum?id=Pk7In-gVEd)
Supplement: supplementary_material [file attachment]

| Sequence                 | LR                                                                                  | SISO                                                                                | MIMO                                                                                 | MIMO<br>tuned                                                                         | GT                                                                                    |
|--------------------------|-------------------------------------------------------------------------------------|-------------------------------------------------------------------------------------|--------------------------------------------------------------------------------------|---------------------------------------------------------------------------------------|---------------------------------------------------------------------------------------|
| $\lambda_{T_1} = 6.63$   | 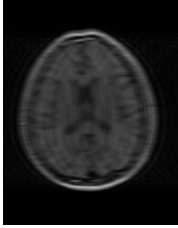   |    |    |    |    |
|                          | 34.38/0.9371                                                                        | 42.42/0.9883                                                                        | 44.60/0.9920                                                                         | <b>45.50/0.9940</b>                                                                   | PSNR/SSIM                                                                             |
|                          |    |    |    |    |    |
| $\lambda_{T_2} = 2.11$   |   |   |   |   |   |
|                          | 29.74/0.8903                                                                        | 36.25/0.9734                                                                        | 36.42/0.9752                                                                         | <b>37.70/0.9832</b>                                                                   | PSNR/SSIM                                                                             |
|                          |  |  |  |  |  |
| $\lambda_{flair} = 8.00$ |  |  |  |  |  |
|                          | 39.89/0.9311                                                                        | 43.94/0.9864                                                                        | 44.74/0.9883                                                                         | <b>45.49/0.9894</b>                                                                   | PSNR/SSIM                                                                             |
|                          |  |  |  |  |  |

Figure 4: Visual comparison of different methods, with PSNR (dB) and SSIM values listed under the images. The difference map is shown beneath each image for better visualization.

| Sequence                 | LR                                                                                  | SISO                                                                                | MIMO                                                                                 | MIMO<br>tuned                                                                         | GT                                                                                    |
|--------------------------|-------------------------------------------------------------------------------------|-------------------------------------------------------------------------------------|--------------------------------------------------------------------------------------|---------------------------------------------------------------------------------------|---------------------------------------------------------------------------------------|
| $\lambda_{T_1} = 6.63$   | 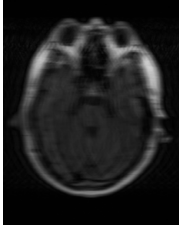   |    |    |    |    |
|                          | 35.46/0.9431                                                                        | 40.82/0.9826                                                                        | 41.84/0.9857                                                                         | <b>42.12/0.9867</b>                                                                   | PSNR/SSIM                                                                             |
|                          |    |    |    |    |    |
| $\lambda_{T_2} = 2.11$   |   |   |   |   |   |
|                          | 32.34/0.9254                                                                        | 36.19/0.9699                                                                        | 36.42/0.9711                                                                         | <b>36.78/0.9695</b>                                                                   | PSNR/SSIM                                                                             |
|                          |  |  |  |  |  |
| $\lambda_{flair} = 8.00$ |  |  |  |  |  |
|                          | 42.54/0.9489                                                                        | 45.24/0.9837                                                                        | 45.89/0.9868                                                                         | <b>46.35/0.9880</b>                                                                   | PSNR/SSIM                                                                             |
|                          |  |  |  |  |  |

Figure 5: Visual comparison of different methods, with PSNR (dB) and SSIM values listed under the images. The difference map is shown beneath each image for better visualization.

| Sequence                 | LR                                                                                  | SISO                                                                                | MIMO                                                                                 | MIMO<br>tuned                                                                         | GT                                                                                    |
|--------------------------|-------------------------------------------------------------------------------------|-------------------------------------------------------------------------------------|--------------------------------------------------------------------------------------|---------------------------------------------------------------------------------------|---------------------------------------------------------------------------------------|
| $\lambda_{T_1} = 2.90$   | 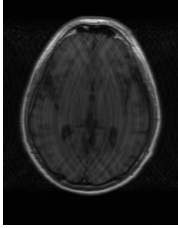   |    |    |    |    |
|                          | 38.30/0.9484                                                                        | 45.03/0.9920                                                                        | 45.35/0.9926                                                                         | <b>46.70/0.9951</b>                                                                   | PSNR/SSIM                                                                             |
|                          |    |    |    |    |    |
|                          |                                                                                     |                                                                                     |                                                                                      |                                                                                       |                                                                                       |
| $\lambda_{T_2} = 2.44$   |   |   |   |   |   |
|                          | 29.78/0.8990                                                                        | 35.43/0.9720                                                                        | 35.93/0.9752                                                                         | <b>37.05/0.9809</b>                                                                   | PSNR/SSIM                                                                             |
|                          |  |  |  |  |  |
|                          |                                                                                     |                                                                                     |                                                                                      |                                                                                       |                                                                                       |
| $\lambda_{flair} = 7.82$ |  |  |  |  |  |
|                          | 41.24/0.9412                                                                        | 44.54/0.9850                                                                        | 45.66/0.9885                                                                         | <b>46.15/0.9891</b>                                                                   | PSNR/SSIM                                                                             |
|                          |  |  |  |  |  |
|                          |                                                                                     |                                                                                     |                                                                                      |                                                                                       |                                                                                       |

Figure 6: Visual comparison of different methods, with PSNR (dB) and SSIM values listed under the images. The difference map is shown beneath each image for better visualization.
